# Supplementary material
Source: PubMed Central journal article supplement (PMC4369396)
Supplement: NIHMS659988-supplement-1.pdf [file NIHMS659988-supplement-1.pdf]

**Supplemental Table I.** Amino-acid sequences and positions of putative OSCAR-binding motifs within different collagens.

| <b>Collagen type</b>          | <b>Uniprot</b> | <b>Sequence</b> | <b>Position</b> |
|-------------------------------|----------------|-----------------|-----------------|
| Collagen alpha 1 (I)          | P02452         | GPPGPAGFA       | 806             |
|                               |                | GPPGATGFP       | 869             |
| Collagen alpha 1 (II)         | P02458         | GAPGPAGE        | 480             |
|                               |                | GAPGPSGFQ       | 657             |
|                               |                | GPPGPAGSA       | 807             |
|                               |                | GPPGPAGFA       | 828             |
|                               |                | GPPGATGFP       | 891             |
|                               |                | GAPGASGDR       | 1008            |
|                               |                | GPPGPSGDQ       | 1143            |
| Collagen alpha-1(III) chain   | P02461         | GAPGPAGSR       | 1074            |
|                               |                | GPPGPAGFP       | 804             |
|                               |                | GGPGAAGFP       | 867             |
|                               |                | GPPGPSGSP       | 891             |
| Collagen alpha-1(IV) chain    | P02462         | GPPGASGYP       | 94              |
| Collagen alpha-1(V) chain     | P20908         | GPPGPAGSP       | 1081            |
| Collagen alpha-1(VII) chain   | Q02388         | GPPGPAGSR       | 1498            |
| Collagen alpha-1(XI) chain    | P20849         | GPPGPAGEP       | 302             |
| Collagen alpha-1(XVI) chain   | Q07092         | GPPGPAGER       | 1401            |
|                               |                | GAPGPSGSP       | 1412            |
| Collagen alpha-1(XVII) chain  | Q9UMD9         | GPPGPSGDP       | 767             |
| Collagen alpha-1(XXVII) chain | Q8IZC6         | GPPGPPGDR       | 1340            |
| Collagen alpha-1(XVIII) chain | P39060         | GAPGPAGAR       | 986             |
| Collagen alpha-2(I) chain     | P08123         | GPPGPAGSR       | 769             |
| Collagen alpha-2(V) chain     | P05997         | GPPGPTGFQ       | 669             |
| Collagen alpha-2(XI) chain    | P13942         | GPPGPAGSP       | 1009            |
| Collagen alpha-3(V) chain     | P25940         | GPPGASGEP       | 1295            |
| Collagen alpha-5(IV) chain    | P29400         | GAPGAPGFP       | 533             |

# A

SP-D mllfllsalvlltqplgyleAEMKTYSHRTMPSACTLVMCSSVESGLPGR  
OSCAR -----

SP-D DGRDGREGPRGEKGDPGLPGAAGQAGMPGQAGPVGPKGDNGSVGEPGPKG  
OSCAR -----

SP-D DTGPSGPPGPPGVPGPAGREGPLGKQGNIGPQGKPGPKGEAGPKGEVGAP  
OSCAR -----GPPGPAGFP-----  
                  \*\*\*\*\*.\*.\*

SP-D GMQGSAGARGLAGPKGERGVPGERGVPGNTGAAGSAGAMGPQGSFGARGP  
OSCAR -----

SP-D PGLKGDGKIPGDKGAKGESGLPDVASLRQQVEALQGQVQHLQAAFSQYKK  
OSCAR -----

SP-D VELFPNGQSVGEKIFKTAGFVKPFTEAQLLCTQAGGQLASPRSAAENAAL  
OSCAR -----

SP-D QQLVVAKNEAAFLSMTDSKTEGKFTYPTGESLVYSNWAPGEPNDGGS  
OSCAR -----

SP-D CVEIFTNGKWNDRACGEKRLVVCEF  
OSCAR -----

# B

SP-D 106 (12 res) - GPPGPPGVPGPA  
Srch seq (12 res) - GXPGPXGFXGXP  
                  \*\*\*\*\*.\*\*\*.

**Supplemental Figure 1.** Molecular characteristics and predicted OSCAR-binding sites of SP-D. (A) Amino acid alignment of human SP-D (SP-D) with the minimum OSCAR-binding motif (OSCAR) (31). Direct amino acid sequence identify (\*); signal peptide, lower case; Cys 15 and 20 involved in the formation of the disulphide bonds required for the stable assembly of SP-D dodecamers and higher order multimers, underlined; alternating exons, black/blue; exon boundaries, red. (B) Alignment of the 12 amino acid residue (res) OSCAR-binding search (Srch) sequence (seq) reveals an extended putative OSCAR-binding motif.

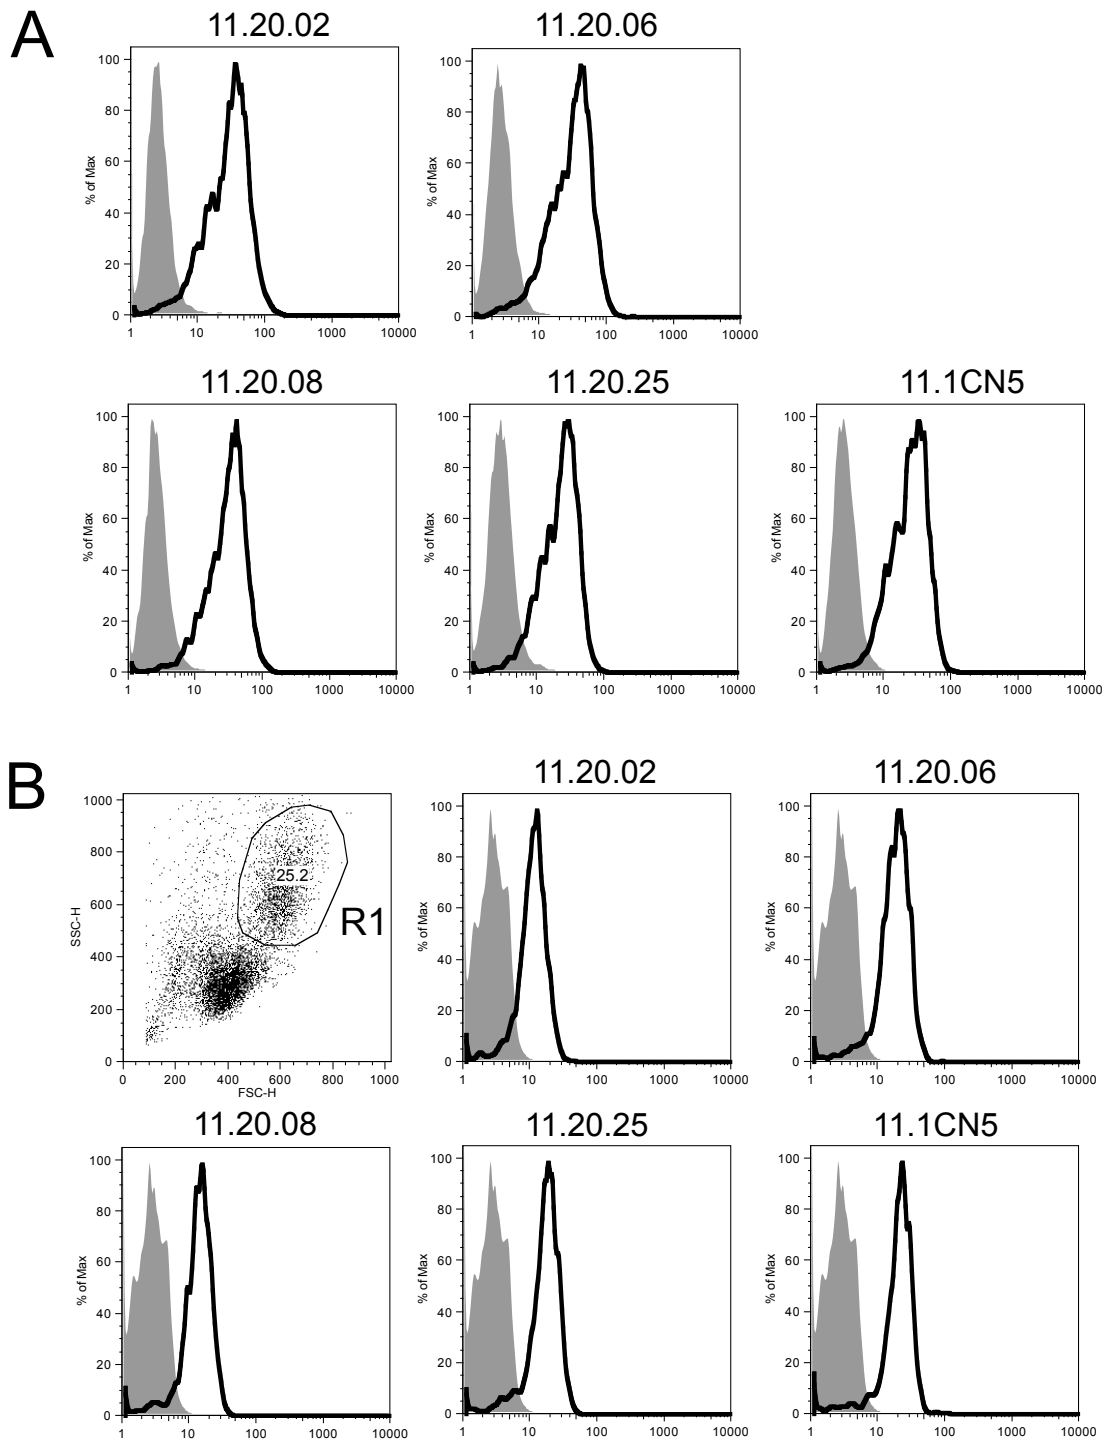

**Supplemental Figure 2.** Generation of novel anti-human OSCAR mAbs. Histogram plots for immunostainings with anti-human OSCAR mAb clones: 11.20.02, 11.20.06, 11.20.08, 11.20.25 or 11.1CN5 (32) for either: **(A)** OSCAR-CD3 $\zeta$  NFAT-GFP reporter cells (open histograms) compared to parental 2B4 NFAT-GFP reporter cells (gray histograms) or **(B)** human blood monocytes (Gate R1, open histograms) compared to IgG1 (gray histograms). Representative immunostaining from one of two donors is shown. All blood monocytes in gate R1 expressed CD14 and all other cells outside gate R1 (e.g. low FSC/SSC lymphocytes) did not express OSCAR (Data not shown).

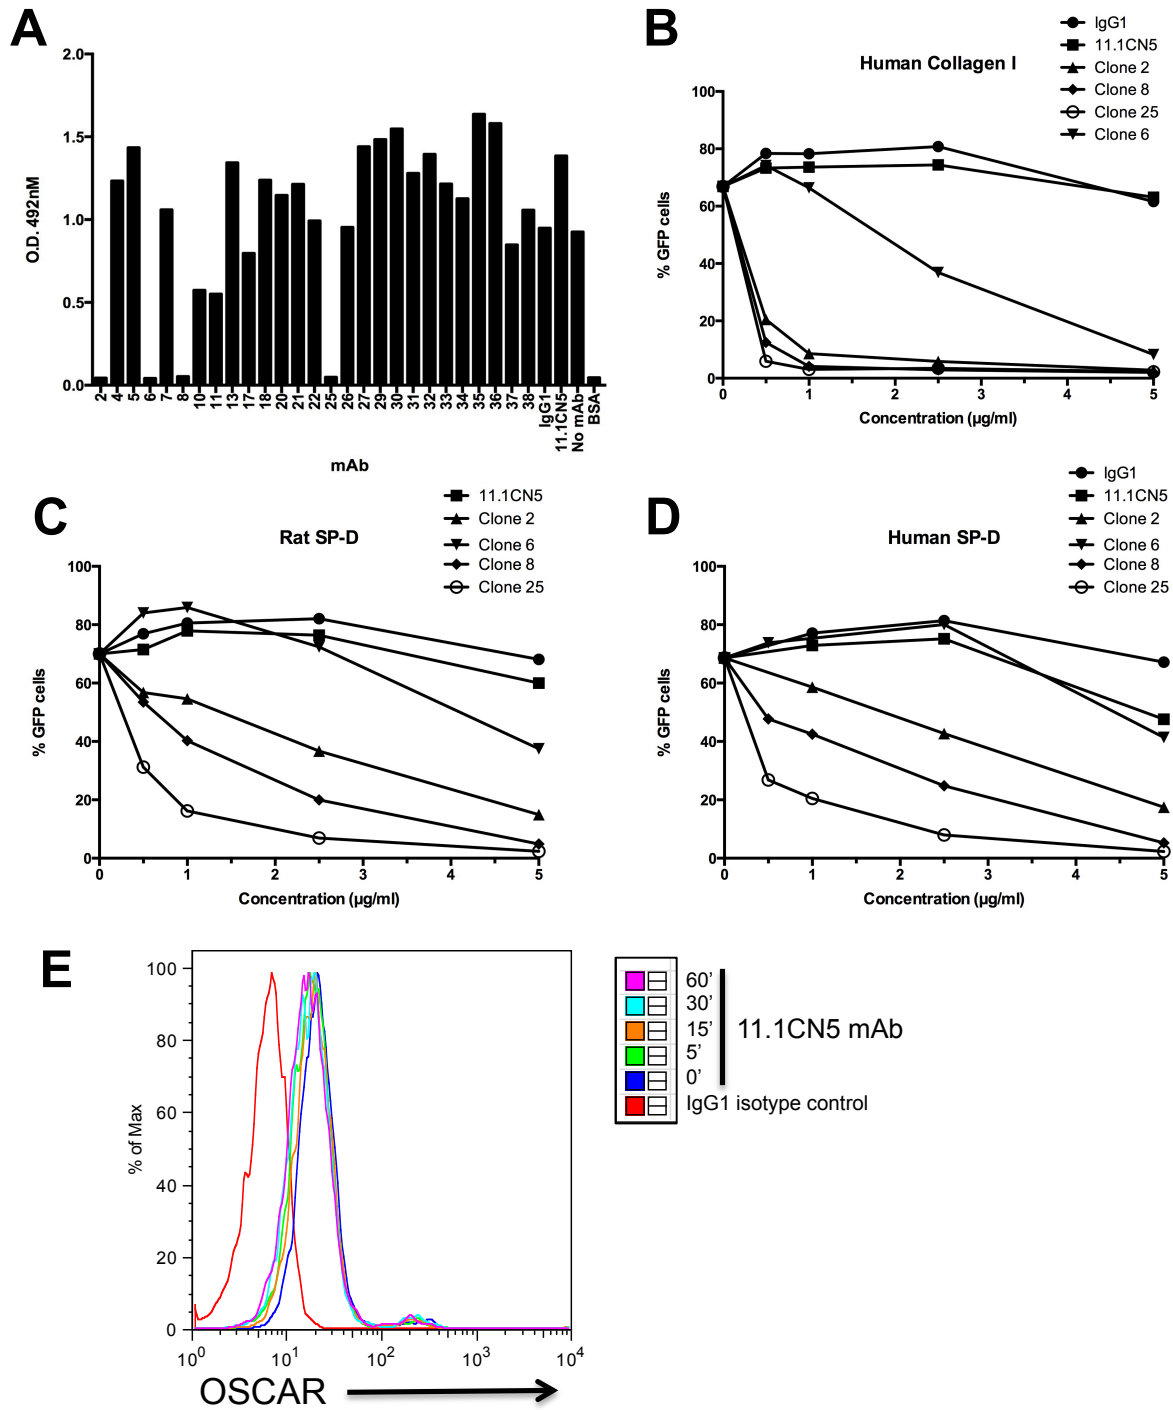

**Supplemental Figure 3.** Screening for OSCAR blocking mAbs. (A) OSCAR-Fc binding to collagen I in the presence of tissue culture supernatants from different anti-human OSCAR hybridomas. Percentage (%) GFP expression from OSCAR-CD3 $\zeta$  NFAT-GFP reporter cells cultured on tissue culture plates coated with: (B) collagen I; recombinant (C) rat or (D) human SP-D in the presence of different concentrations of purified mAbs: 11.20.02, 11.20.06, 11.20.08, 11.20.25, 11.1CN5 or IgG1 (0-5 $\mu\text{g/ml}$ , x-axis), respectively. (E) OSCAR cell surface expression on monocytes left untreated (blue, 0') or treated with 2.5 $\mu\text{g/ml}$  human SP-D for 5 (green), 15 (orange), 30 (cyan) and 60 (pink) mins, respectively compared to IgG1 isotype control (red).
